# Supplementary material
Source: publisher figshare collection journal article supplement (https://tandf.figshare.com/ndownloader/files/18017366)
Supplement: Supplementary file 1 [file 18017366]

**
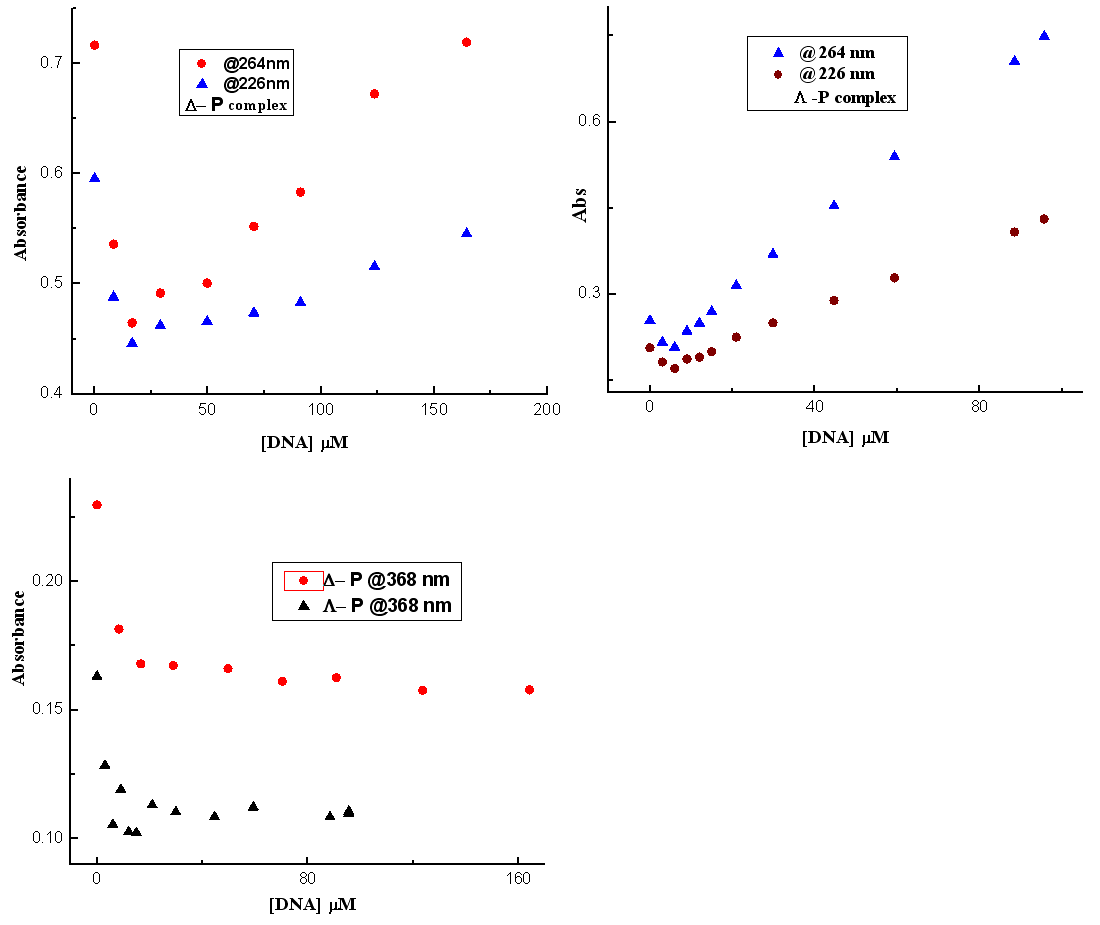
**

**Fig. S1.** The absorbance of Δ&Λ- P complexes at a fix wavelength against the DNA concentration.





**

**

**Fig. S2:** Absorbance of corresponding concentration of two sets of B& P-enantiomers for comparison aims; [DNA]=118µM


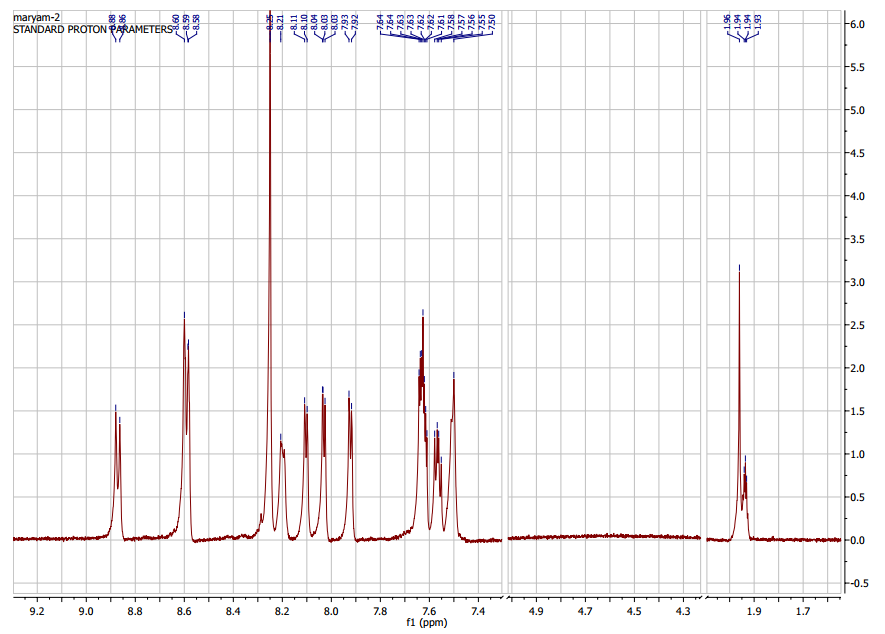


The NMR of B-complex


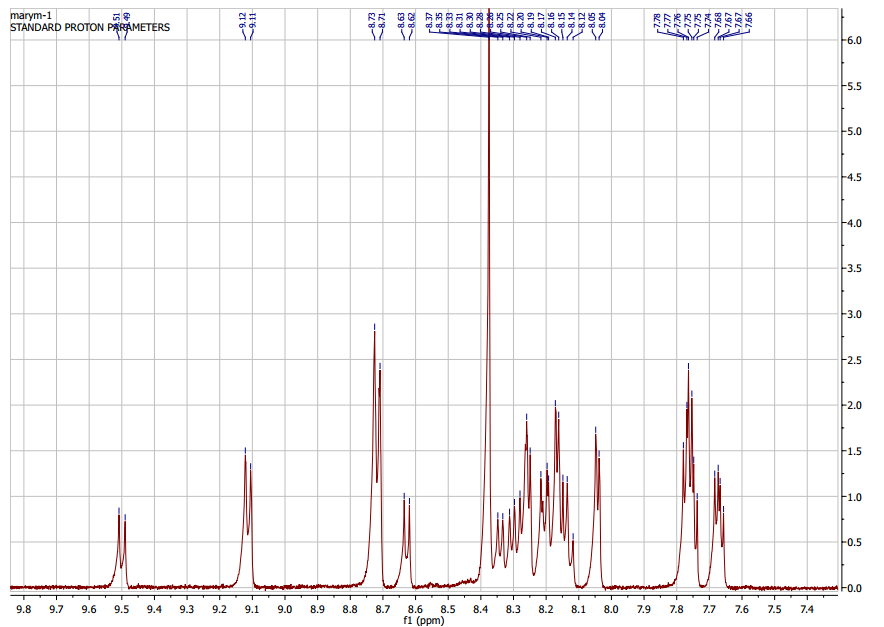


The NMR of P-complex

**CD Spectra**


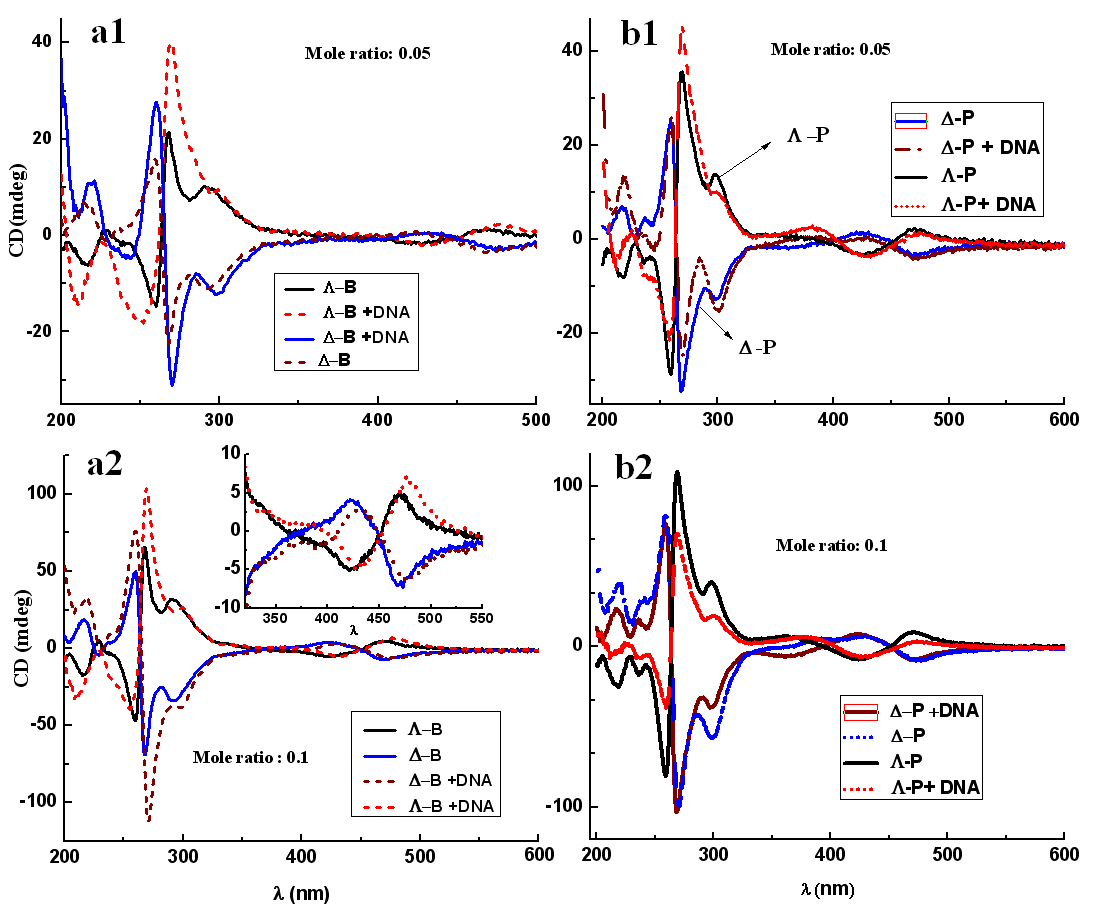


**Fig. S3.** CD Spectra of Enantiomers of P-complex (b1-b2) and B-complex (a1-a2) in different mole ratios with a fix concentration of DNA (as shown the ratio on the figure; 0.05 & 0.1) and variation on the bands.

**Induced Circular Dichroism Spectra (ICD)**


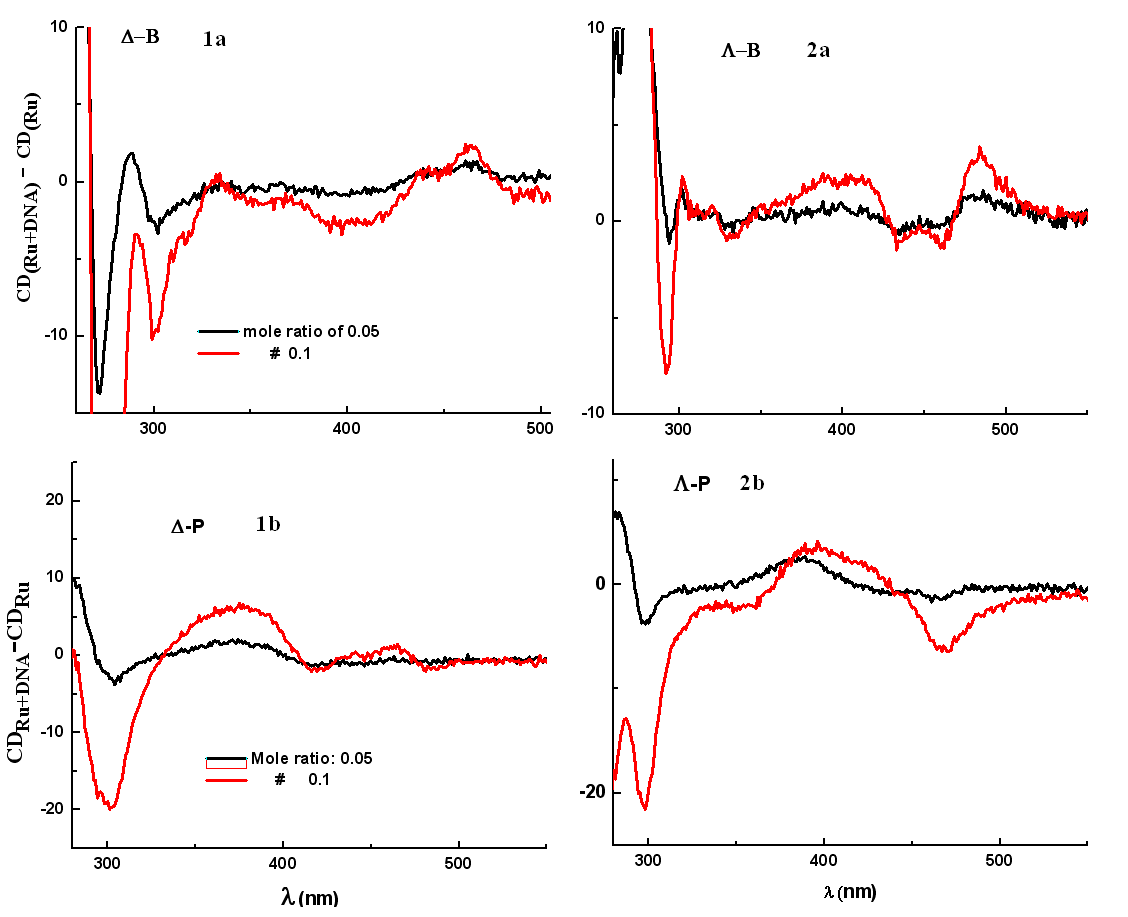


**Fig. S4.** ICD spectra (obtained by subtracting the free metal complex spectra from the ct-DNA plus metal complex CD spectra) DNA concentration (120 µM) for both enantiomers was constant while concentration of complex was varying and CD spectra were recorded on two mole ratios.
